# Supplementary material for: LC-MS/MS Method Development for the Discovery and Identification of Amphidinols Produced by Amphidinium
Source: PubMed Central journal article supplement (PMC7601433; doi:10.3390/md18100497), 2020-09-29
Supplement: marinedrugs-18-00497-s001.pdf [file marinedrugs-18-00497-s001.pdf]

## Supplementary materials:

# LC-MS/MS method development for the discovery and identification of amphidinols produced by *Amphidinium*

Marvin Wellkamp <sup>1</sup>, Francisco García-Camacho <sup>2</sup>, Lorena M. Durán-Riveroll <sup>3</sup>, Jan Tebben <sup>4</sup>, Urban Tillmann <sup>4</sup>, and Bernd Krock <sup>4,\*</sup>

<sup>1</sup> Alfred-Wegener-Institut für Polar und Meeresforschung, 27570 Bremerhaven, Germany; marvin.wellkamp@web.de

<sup>2</sup> Chemical Engineering Department, University of Almería, 04120 La Cañada, Almería; fgarcia@ual.es

<sup>3</sup> CONACyT-Departamento de Biotecnología Marina, Centro de Investigación Científica y de Educación Superior de Ensenada, 22860 Ensenada, B.C. México; lduran@conacyt.mx

<sup>4</sup> Section Ecological Chemistry, Alfred Wegener Institute, Helmholtz Centre for Polar and Marine Research, 27570 Bremerhaven, Germany; jan.tebben@awi.de (J.T.); urban.tillmann@awi.de (U.T.)

\* Correspondence: Bernd.Krock@awi.de

**Figure S1.** HRMS-CID-spectrum and fragmentation pattern of LP-D [M+Na]<sup>+</sup> at *m/z* 1329.7548.

**Figure S2.** CID-spectrum and fragmentation pattern of AM-22 [M+Na]<sup>+</sup> at *m/z* 1667.9.

**Figure S3.** CID-spectrum and fragmentation pattern of LS-A [M+Na]<sup>+</sup> at *m/z* 1295.8.

**Figure S4.** CID-spectrum and fragmentation pattern of LP-B/LP-C [M+Na]<sup>+</sup> at *m/z* 1343.7, here shown on the structure of LP-B.

**Figure S5.** CID-spectrum and fragmentation pattern of putatively CAR-E [M+Na]<sup>+</sup> at *m/z* 1421.9.

**Figure S6.** CID-spectrum and fragmentation pattern of putatively AM-4 [M+Na]<sup>+</sup> at *m/z* 1323.8.

**Figure S7.** CID-spectrum and fragmentation pattern of AM-18 [M+Na]<sup>+</sup> at *m/z* 1381.8.

**Figure S8.** CID-spectrum and fragmentation pattern of AM-19 [M+Na]<sup>+</sup> at *m/z* 1483.8.

**Figure S9.** CID-spectrum and fragmentation pattern of AM-A [M+Na]<sup>+</sup> at *m/z* 1361.8.

**Figure S10.** CID-spectrum and fragmentation pattern of AM-A [M+Na]<sup>+</sup> at *m/z* 1463.8.

**Figure S11.** CID-spectrum and fragmentation pattern of LP-D [M-H]<sup>-</sup> at *m/z* 1305.8.

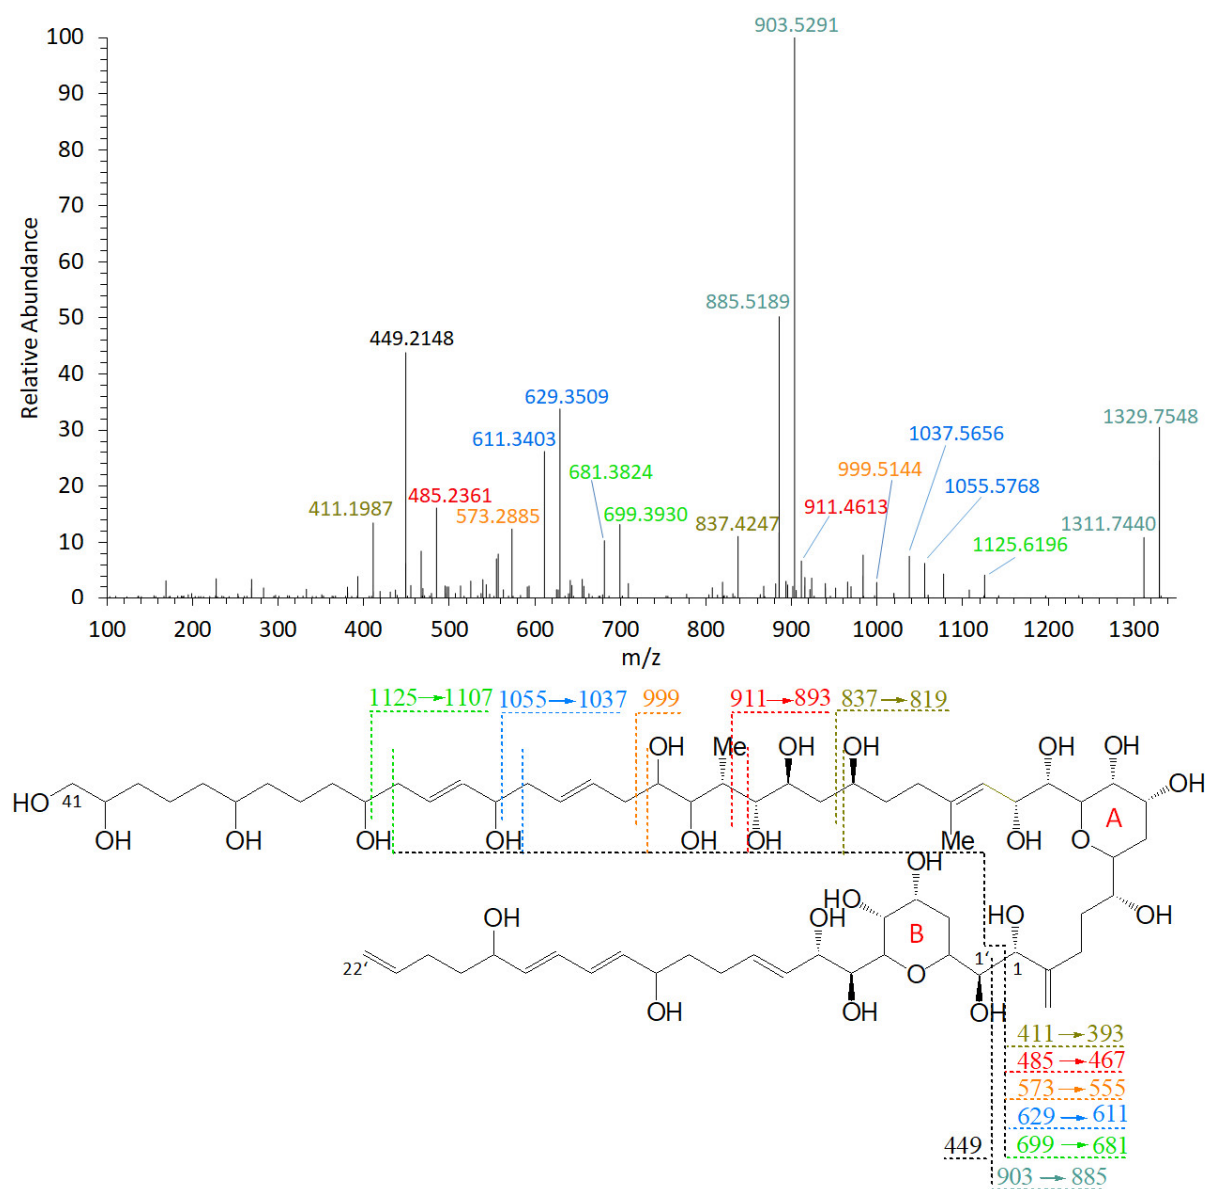

**Figure S1.** HRMS-CID-spectrum and fragmentation pattern of LP-D  $[M+Na]^+$  at  $m/z$  1329.7548.

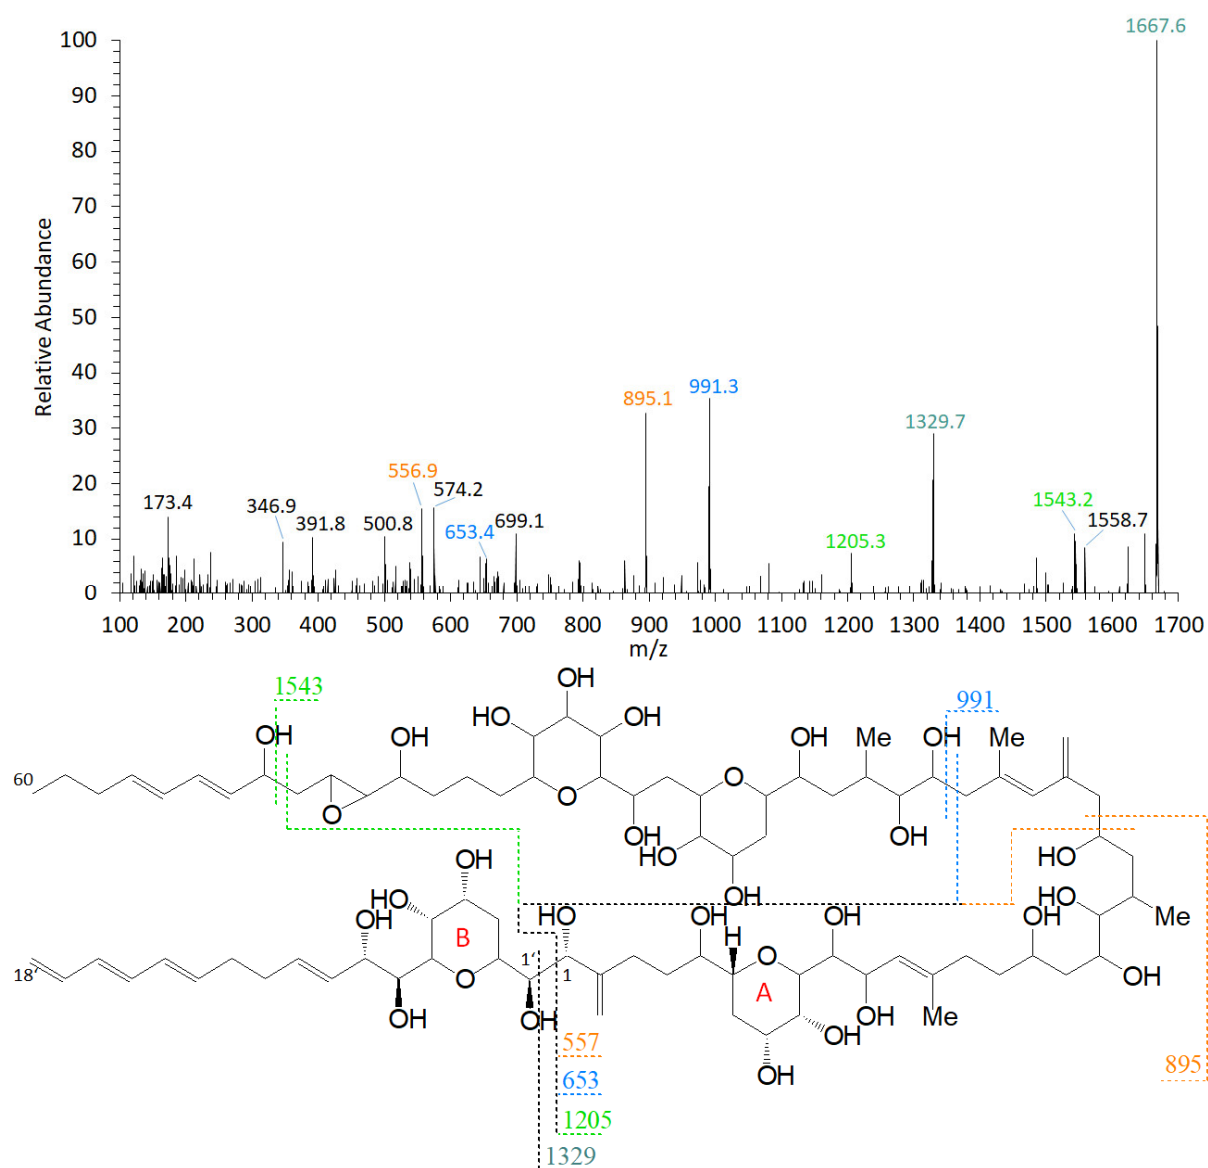

Figure S2. CID-spectrum and fragmentation pattern of AM-22 [M+Na]<sup>+</sup> at m/z 1667.9.

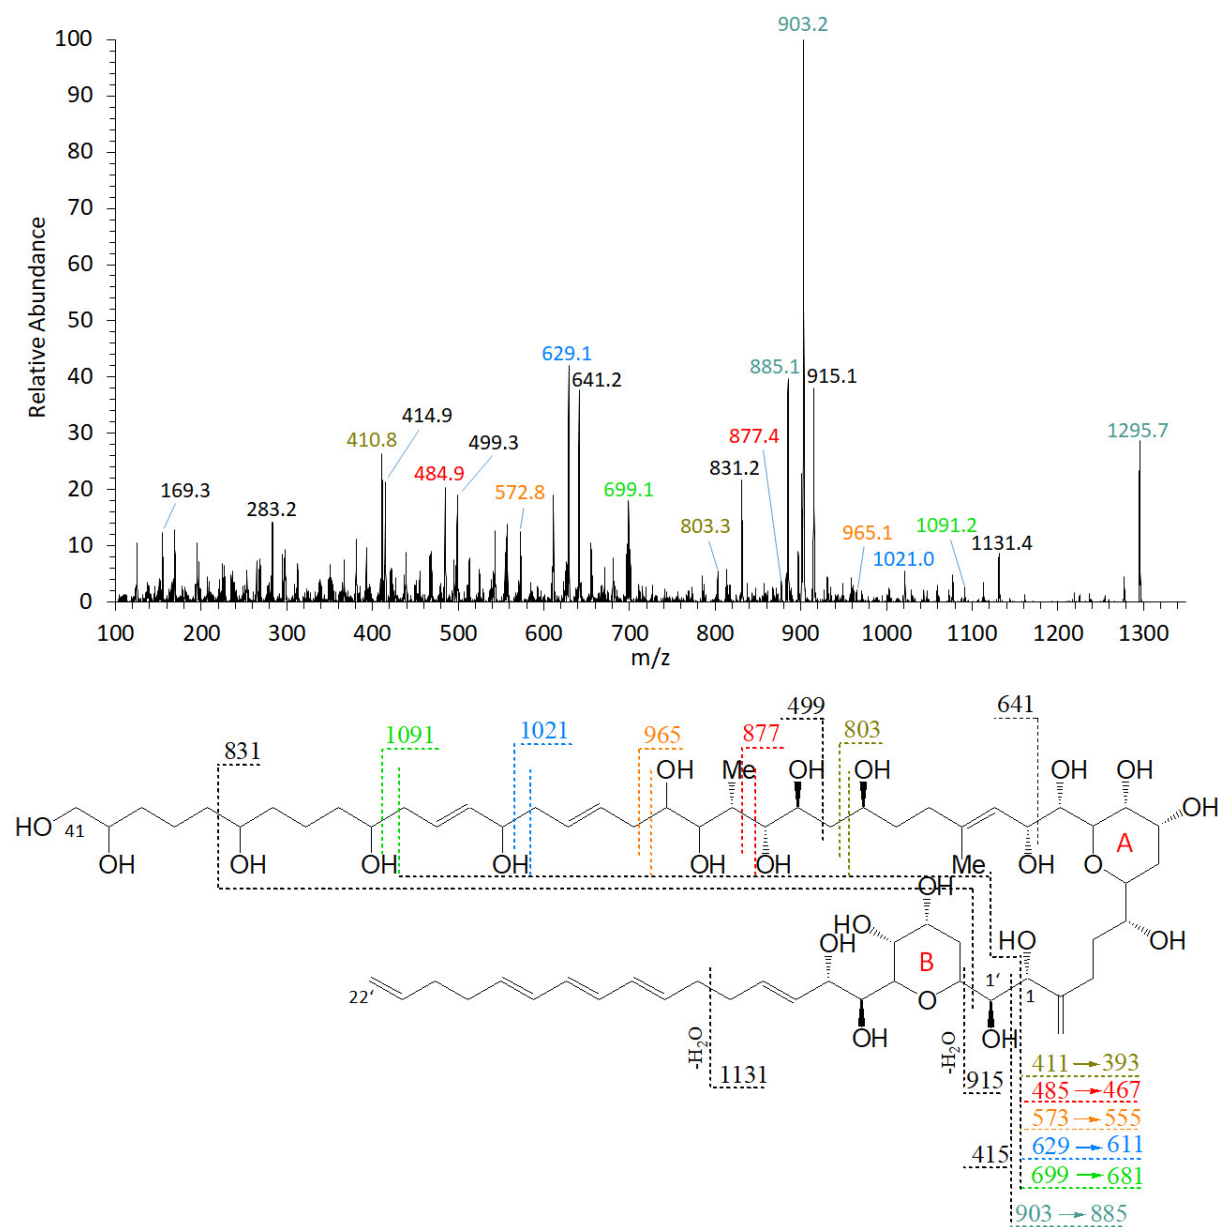

**Figure S3.** CID-spectrum and fragmentation pattern of LS-A [M+Na]<sup>+</sup> at m/z 1295.8.

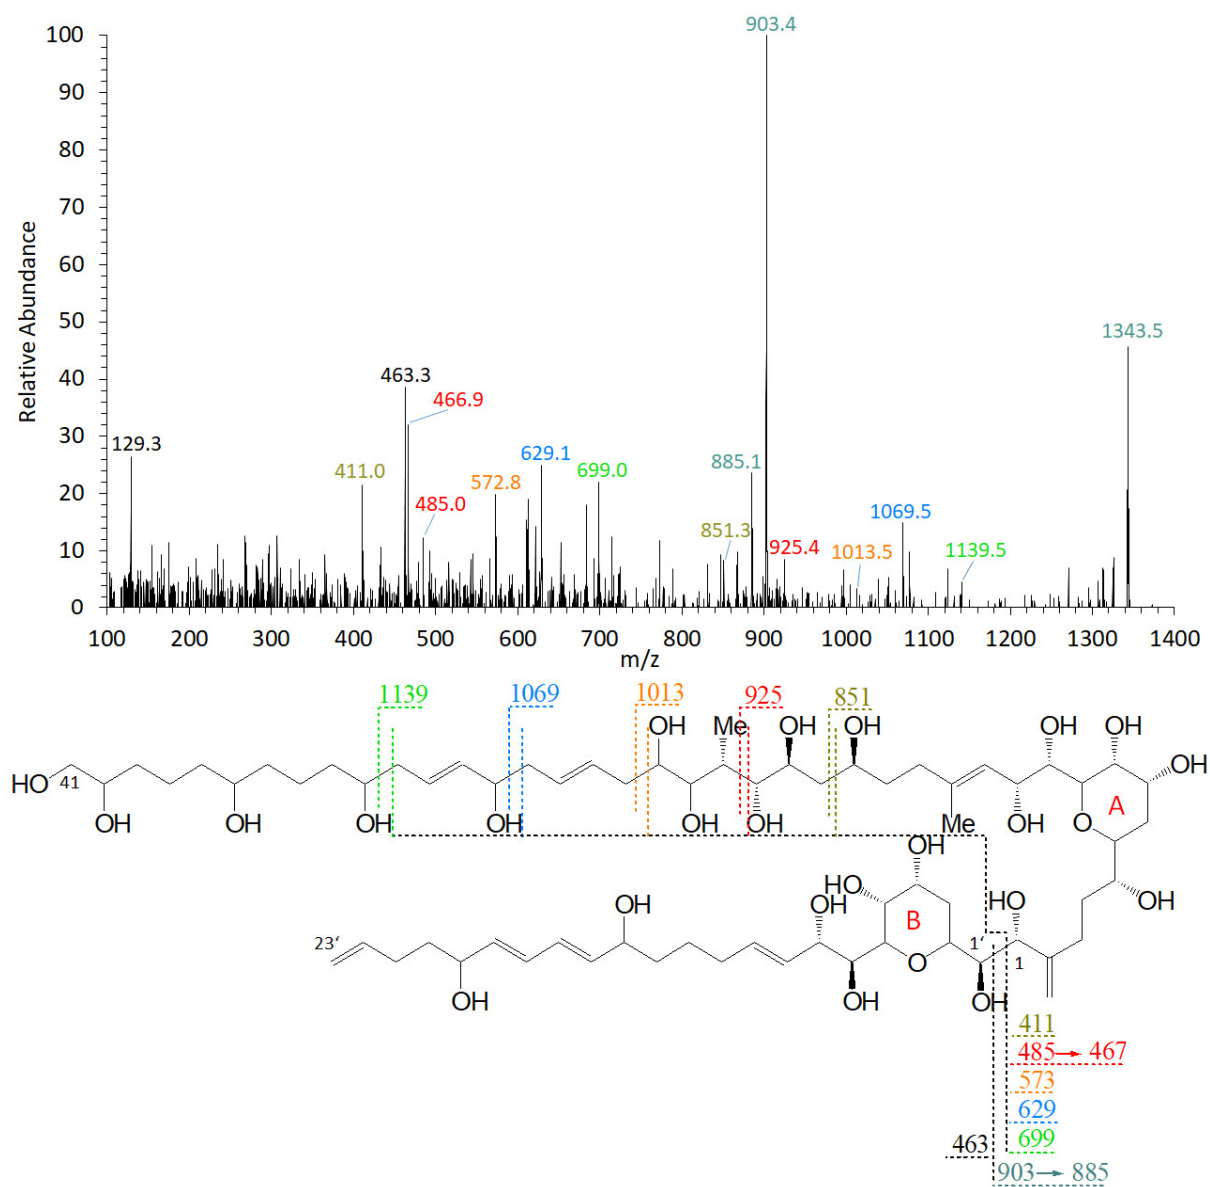

**Figure S4.** CID-spectrum and fragmentation pattern of LP-B/LP-C  $[M+Na]^+$  at  $m/z$  1343.7, here shown on the structure of LP-B.

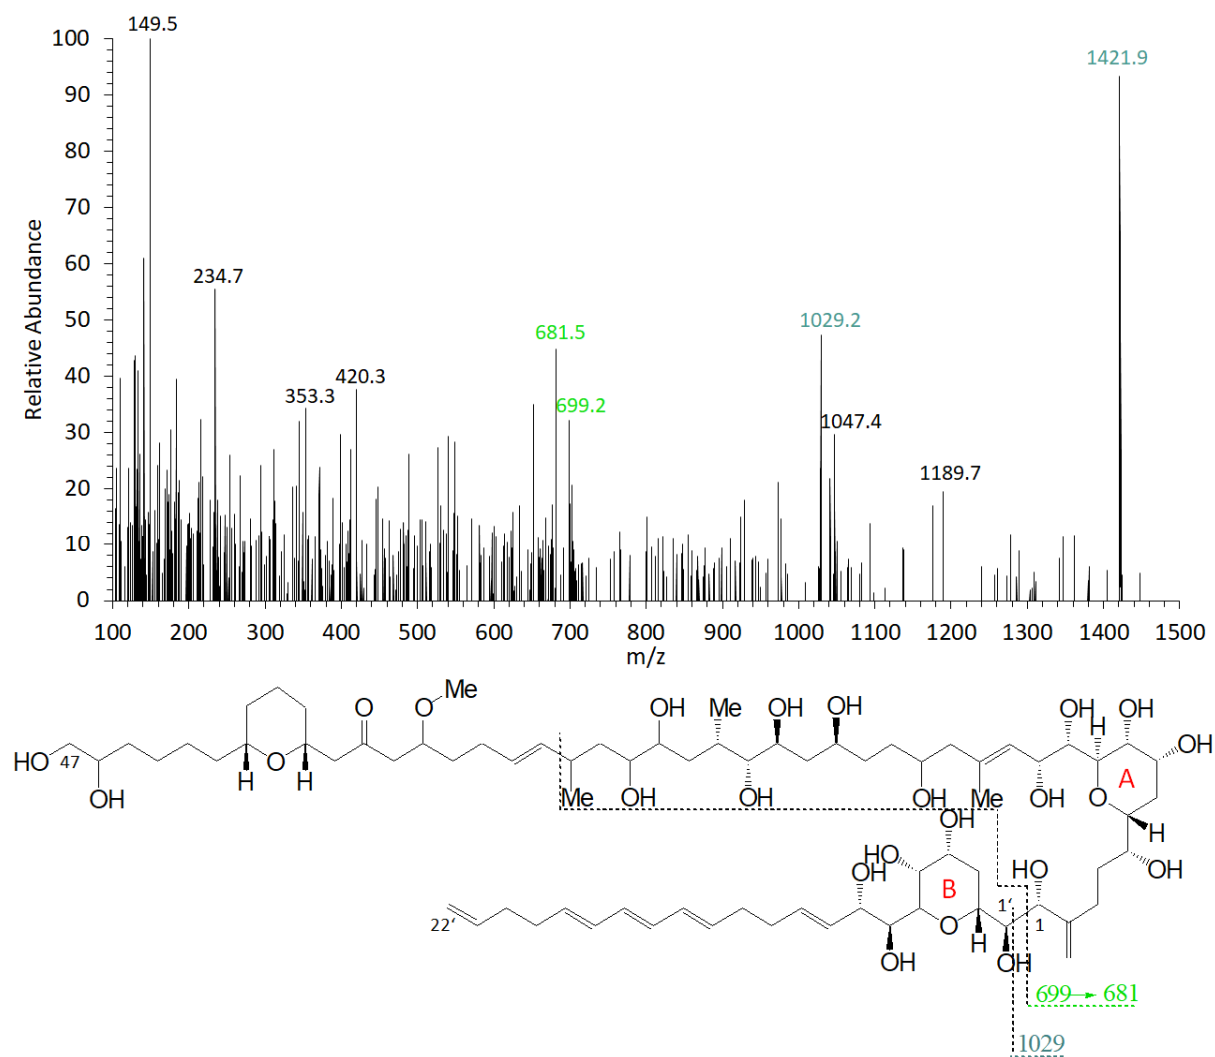

**Figure S5.** CID-spectrum and fragmentation pattern of putatively CAR-E  $[M+Na]^+$  at  $m/z$  1421.9.

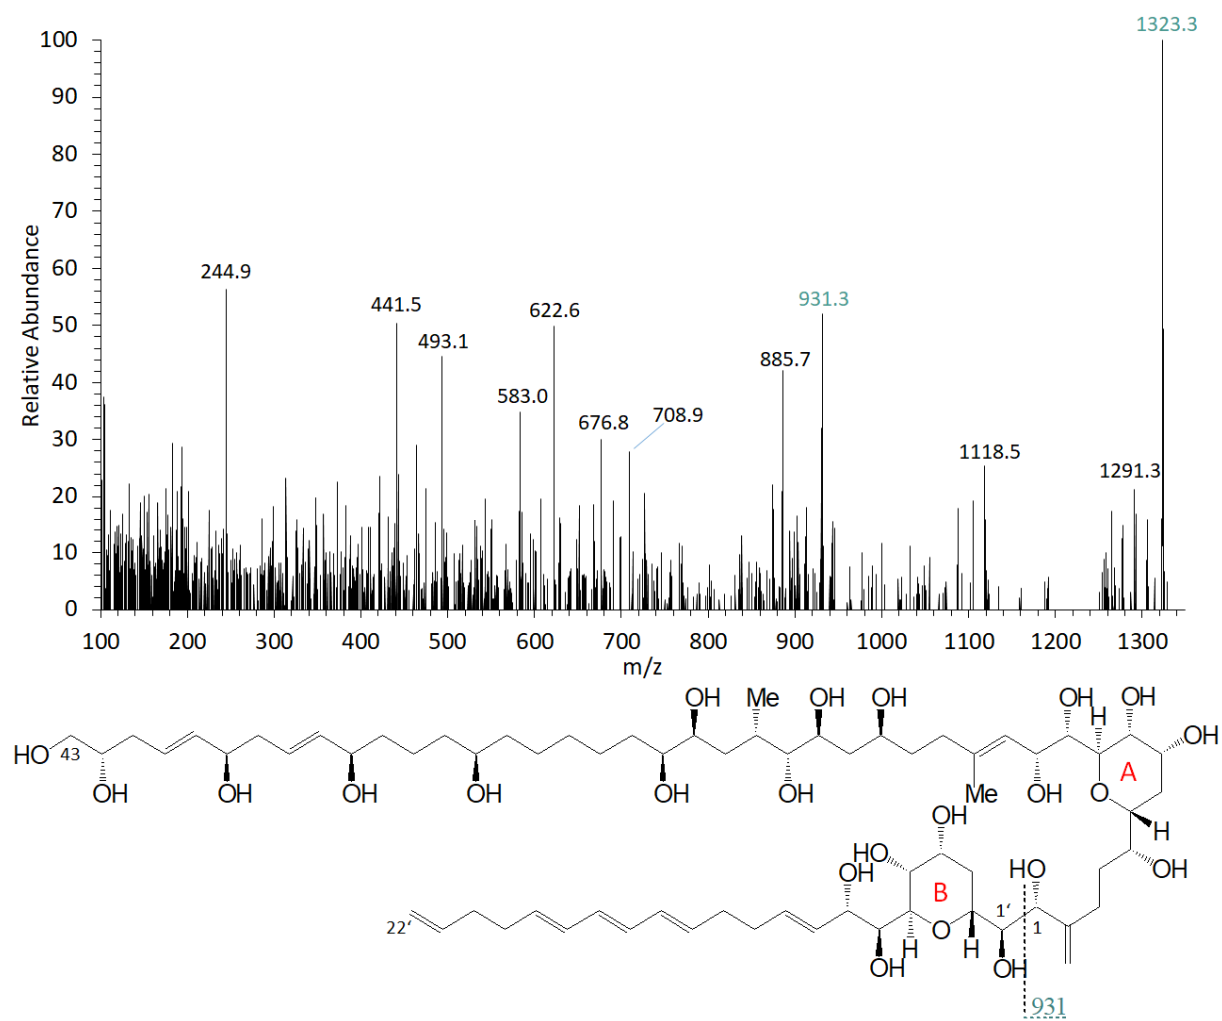

**Figure S6.** CID-spectrum and fragmentation pattern of putatively AM-4 [M+Na]<sup>+</sup> at m/z 1323.8.

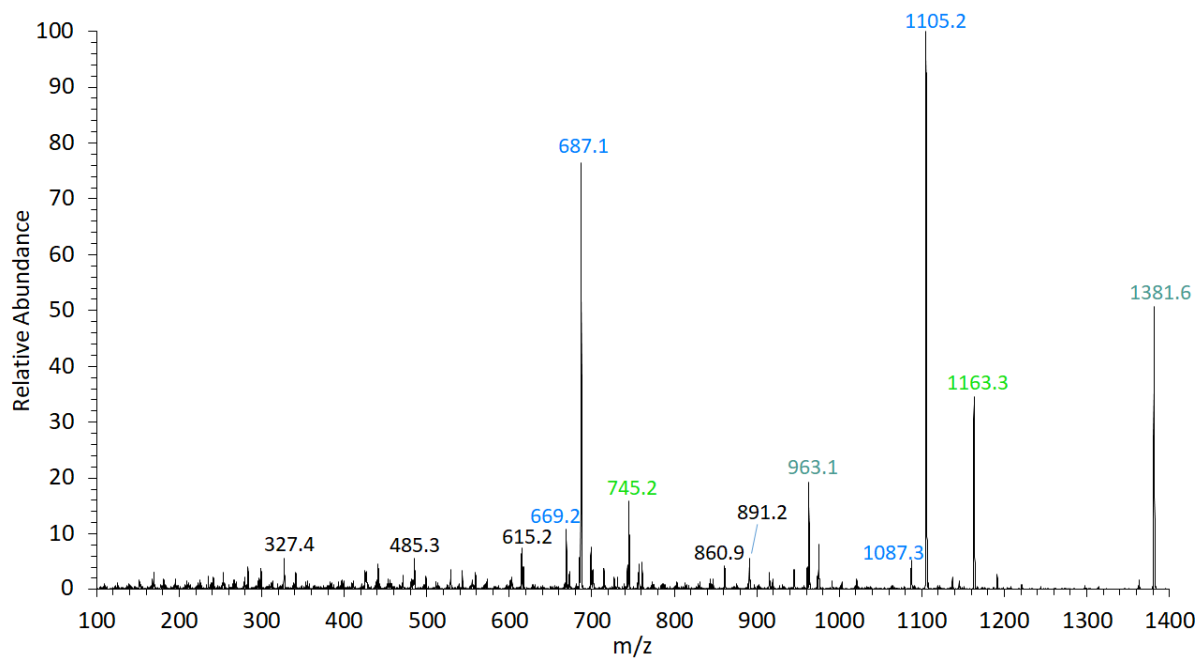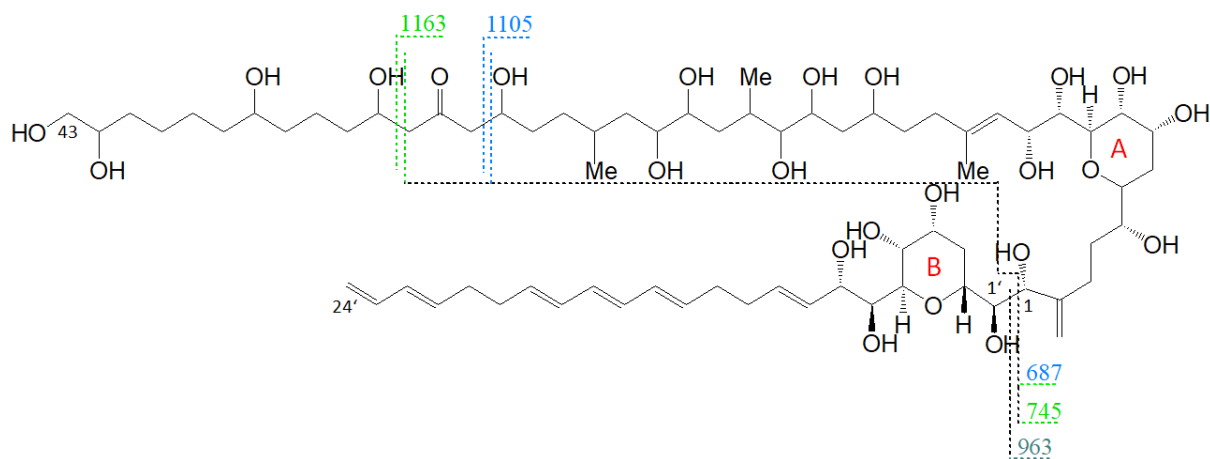



**Figure S7.** CID-spectrum and fragmentation pattern of AM-18  $[M+Na]^+$  at  $m/z$  1381.8.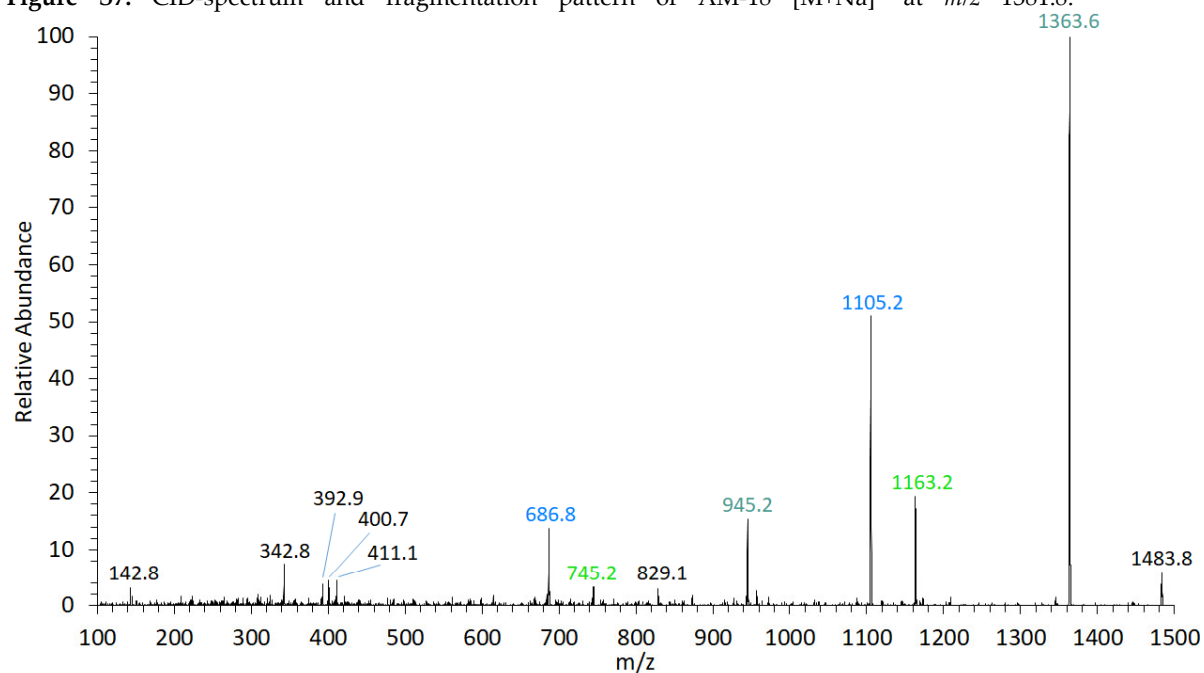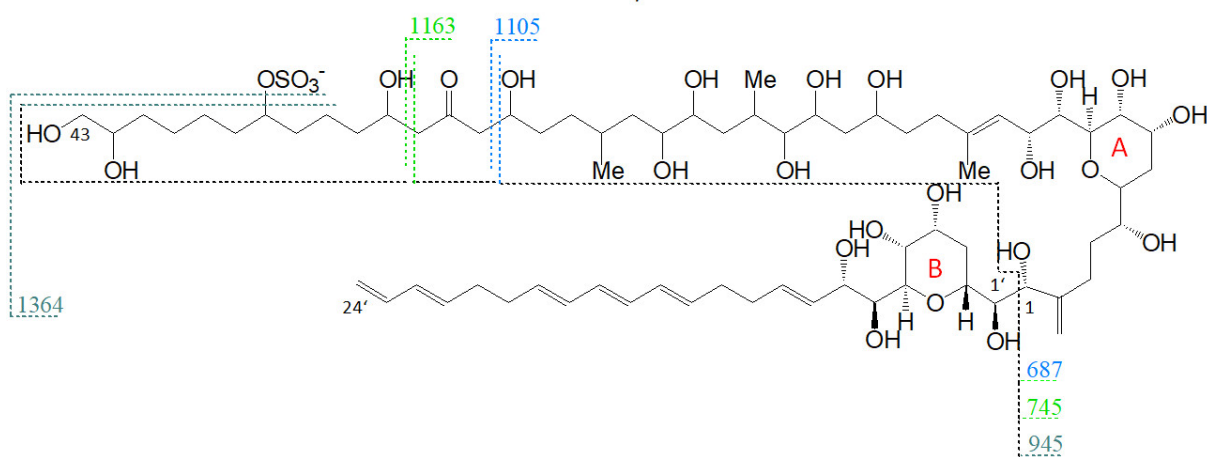**Figure S8.** CID-spectrum and fragmentation pattern of AM-19  $[M+Na]^+$  at  $m/z$  1483.8.

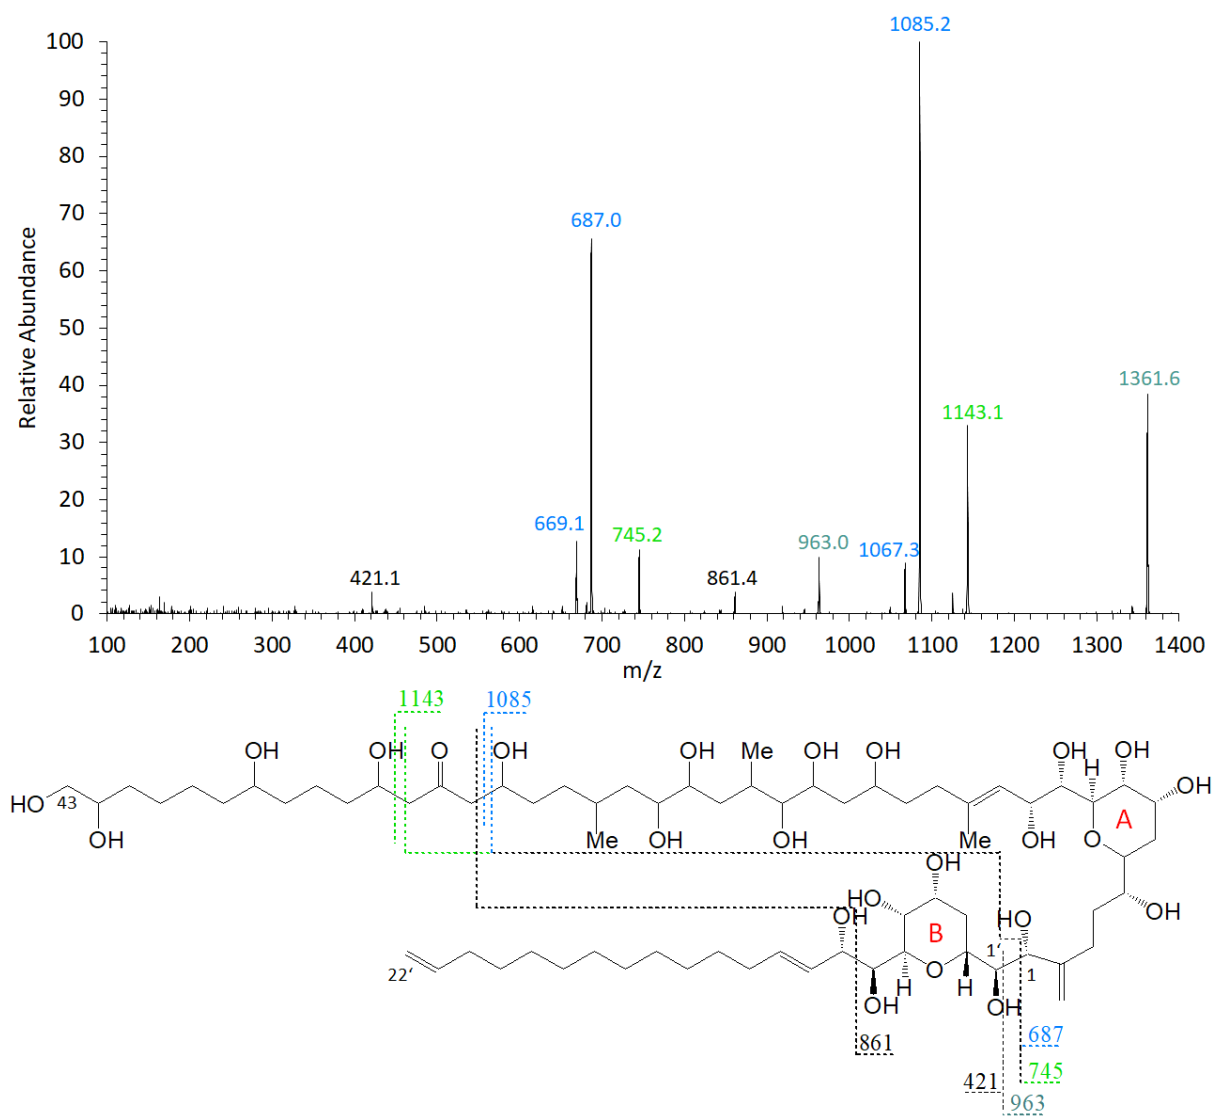

**Figure S9.** CID-spectrum and fragmentation pattern of AM-A [M+Na]<sup>+</sup> at m/z 1361.8.

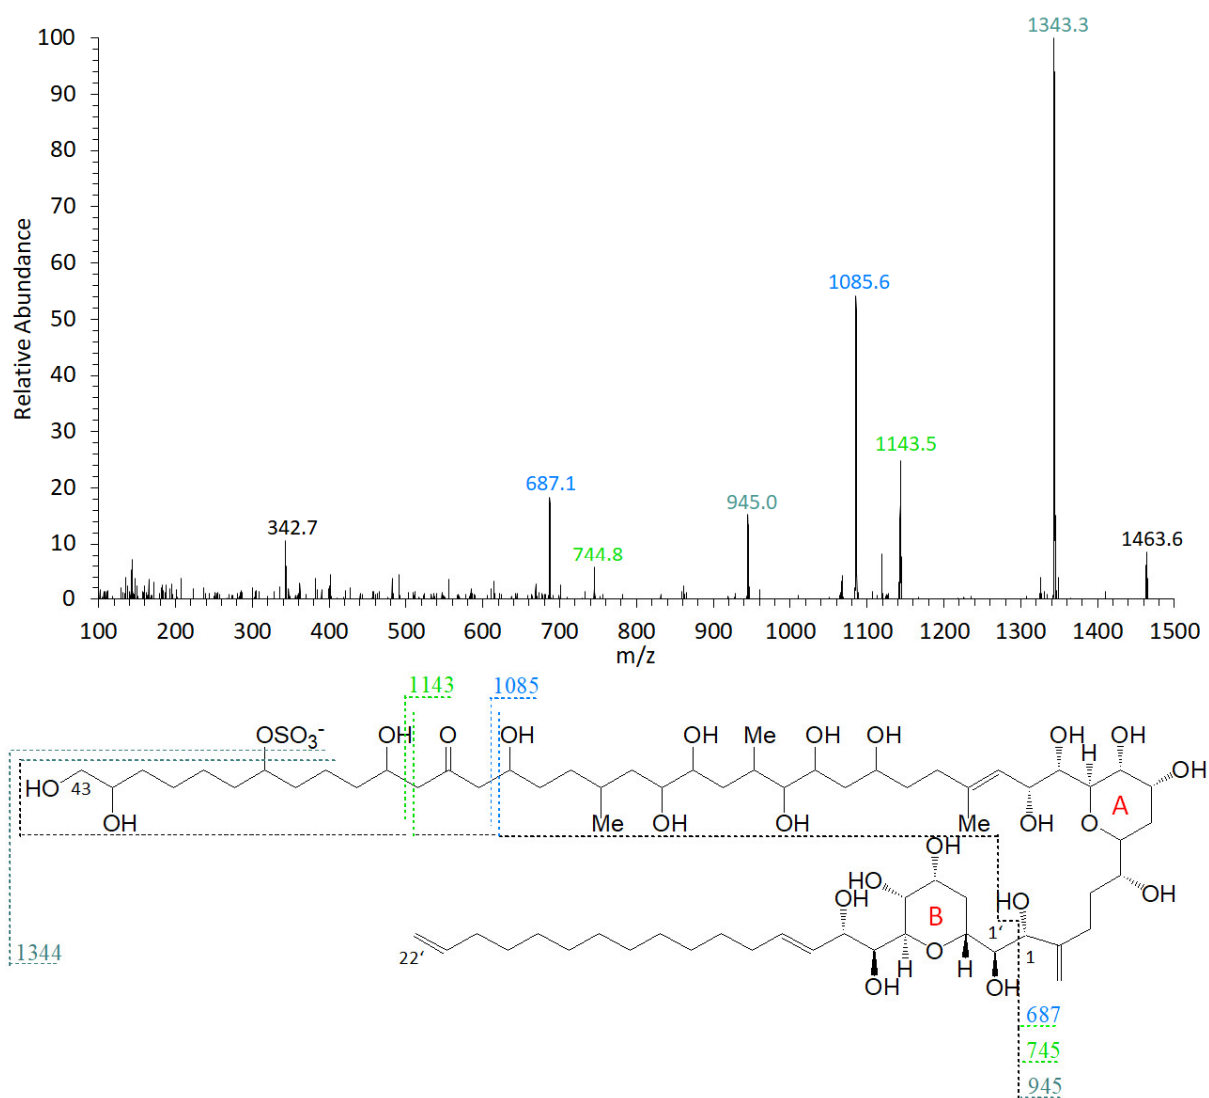

Figure S10. CID-spectrum and fragmentation pattern of AM-A  $[M+Na]^+$  at  $m/z$  1463.8.

190630\_BK\_STD\_NEG\_05\_#213 RT: 2.29 AV: 1 NL: 2.52E6  
F: FTMS - p ESI d Full ms2 1305.7654@hcd30.00 [90.0000-1350.0000]

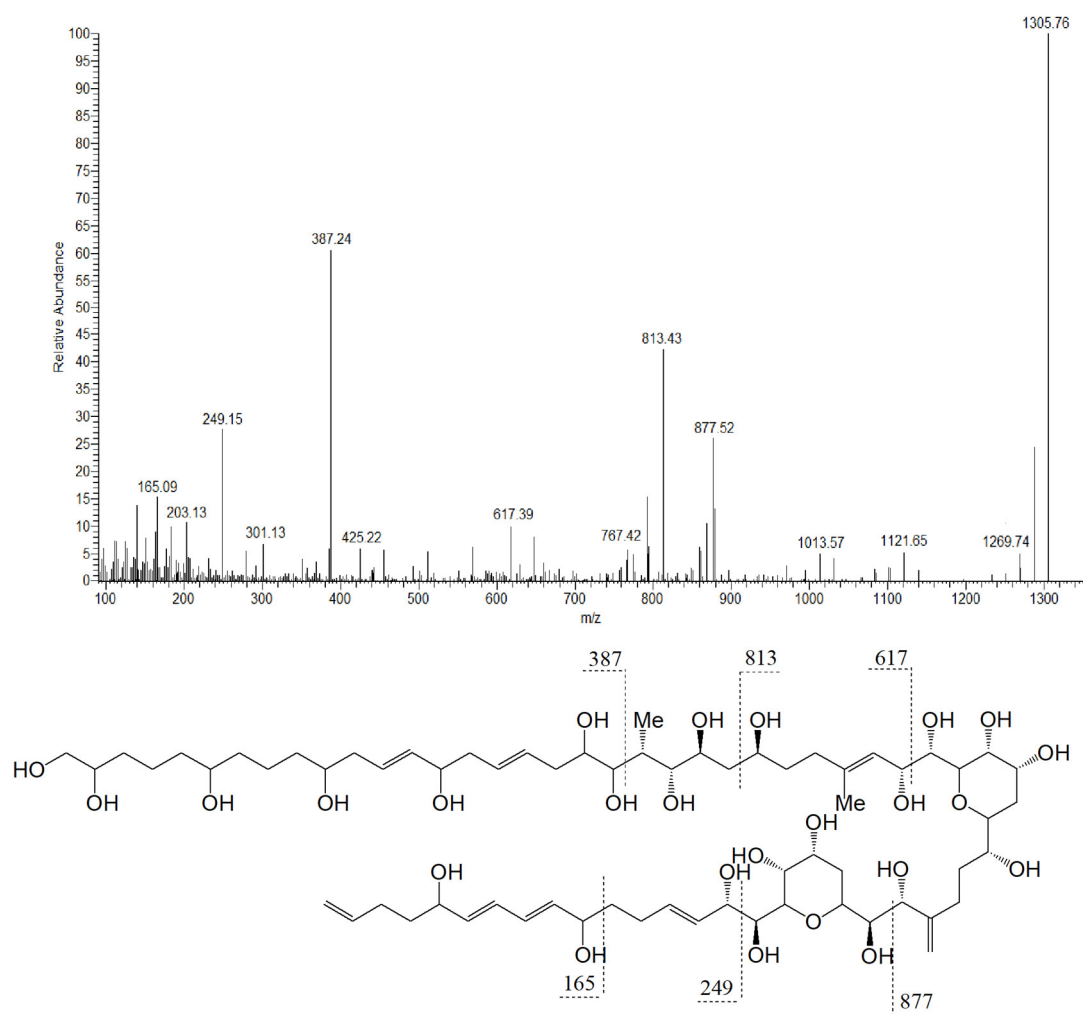

Figure S11. CID-spectrum and fragmentation pattern of LP-D [M-H]<sup>-</sup> at m/z 1305.8.

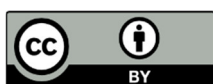

© 2020 by the authors. Licensee MDPI, Basel, Switzerland. This article is an open access article distributed under the terms and conditions of the Creative Commons Attribution (CC BY) license (<http://creativecommons.org/licenses/by/4.0/>).
